# Supplementary material for: Virus and host-specific differences in oral human herpesvirus shedding kinetics among Ugandan women and children
Source: PubMed Central journal article supplement (PMC5638921; doi:10.1038/s41598-017-12994-0), 2017-10-12
Supplement: 41598_2017_12994_MOESM1_ESM.pdf [file 41598_2017_12994_MOESM1_ESM.pdf]

**Supplementary Material for the manuscript:**

**“Virus and host-specific differences in oral human herpesvirus shedding kinetics among Ugandan women and children”**

Laura Matrajt<sup>a\*</sup>, Soren Gantt<sup>a,b\*</sup>, Bryan T. Mayer<sup>a</sup>, Elizabeth M. Krantz<sup>a</sup>, Jackson Orem<sup>c, d</sup> Anna Wald<sup>a,e,f,g</sup>, Lawrence Corey<sup>a,e,g,h</sup>, Joshua T. Schiffer<sup>a,e,h</sup>, Corey Casper<sup>a,e,f,h,I,j</sup>

<sup>a</sup>Fred Hutchinson Cancer Research Center, Seattle, WA, USA; <sup>b</sup>Department of Pediatrics, Division of Infectious Diseases, University of British Columbia, Vancouver, BC, CANADA; <sup>c</sup>Uganda Cancer Institute, Makerere University, Kampala, UGANDA; <sup>d</sup>College of Health Sciences, Makerere University, Kampala, UGANDA; <sup>e</sup>Department of Medicine, University of Washington, Seattle, WA 98195, USA; <sup>f</sup>Department of Epidemiology, University of Washington, Seattle, WA, USA; <sup>g</sup>Department of Laboratory Medicine, University of Washington, Seattle, WA, USA; <sup>h</sup>Clinical Research Division, Fred Hutchinson Cancer Research Center, Seattle, WA, USA; <sup>i</sup>Public Health Science Division, Fred Hutchinson Cancer Research Center, Seattle, WA, USA; <sup>j</sup>Department of Global Health, University of Washington, Seattle, WA, USA

\*These authors contributed equally to this work.

**Figure S1: Oral HSV shedding patterns within families.** Each panel depicts the oral shedding of HSV in a single household. No HSV was detected within family 31 during the period of the study. Breaks in the lines indicate gaps between two samples of over 15 days.

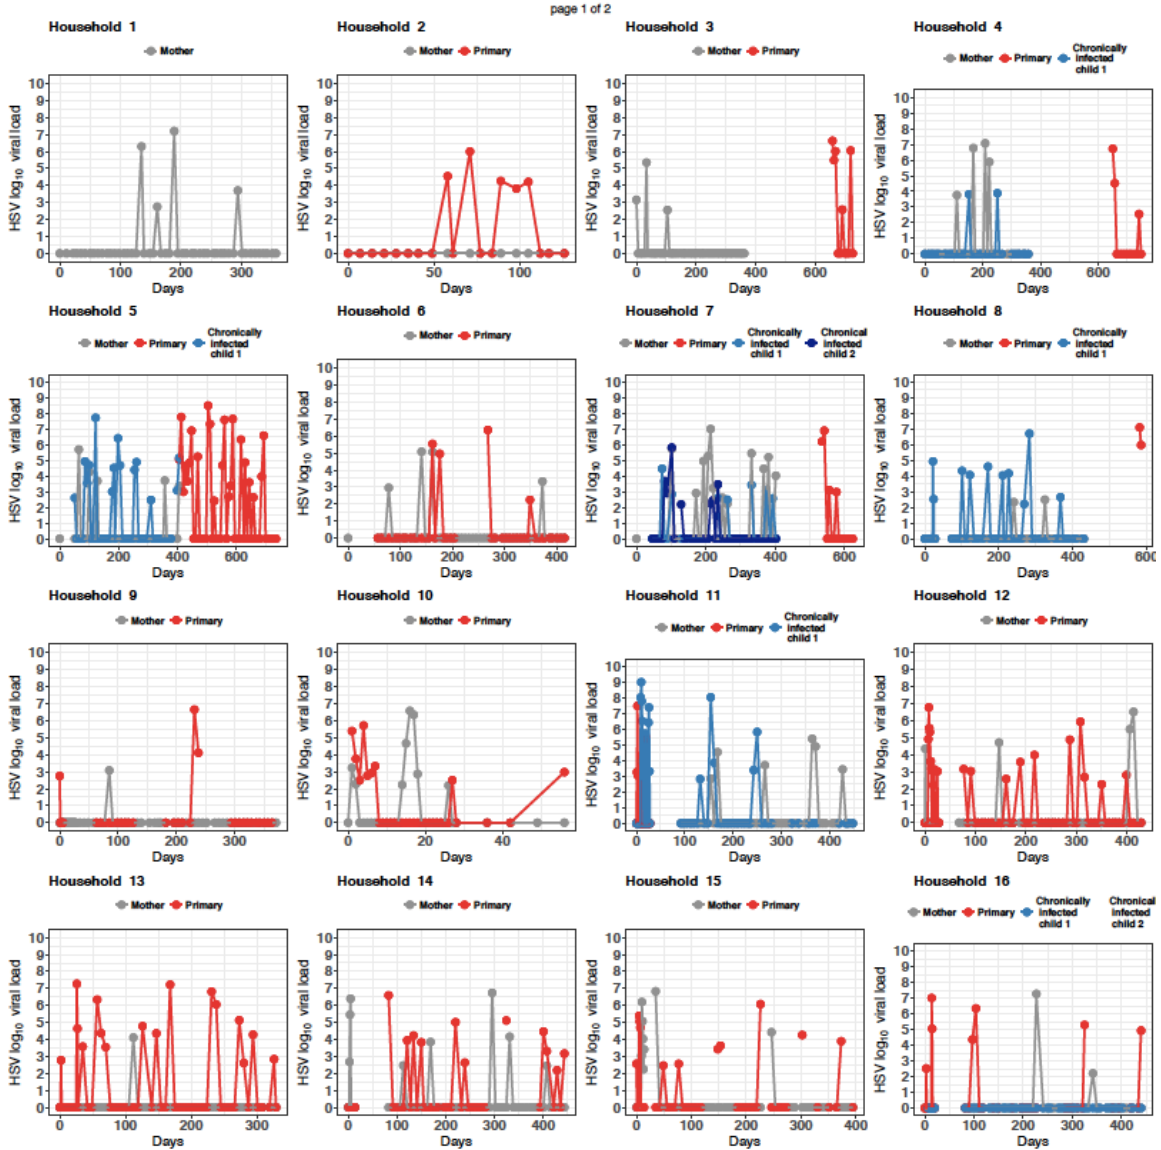

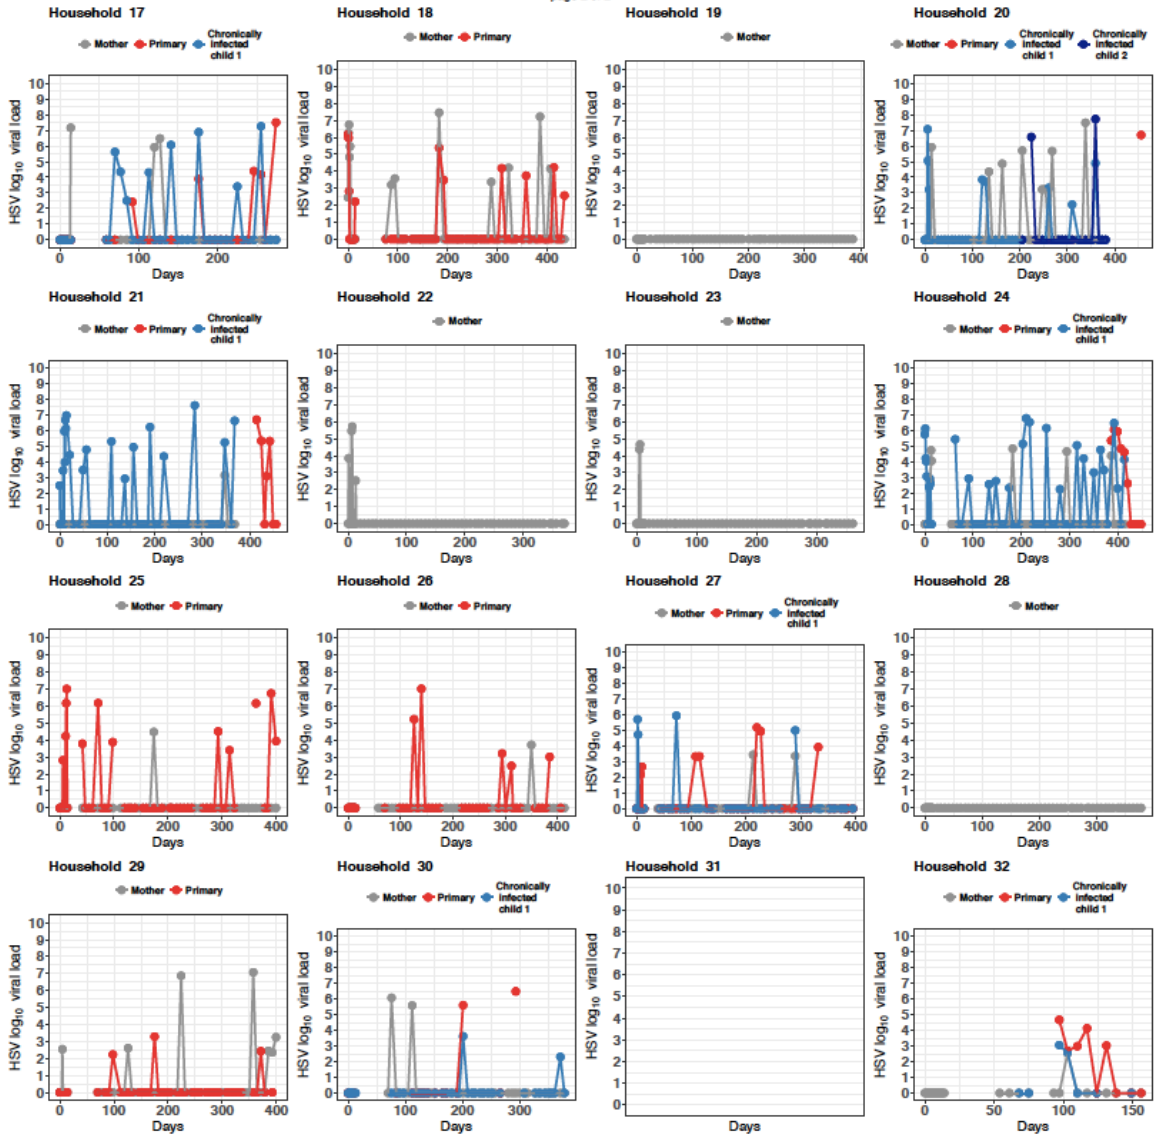

**Figure S2: Oral EBV shedding patterns within families.** Each panel depicts the oral shedding of EBV in a single household. Breaks in the lines indicate gaps between two samples of over 15 days.

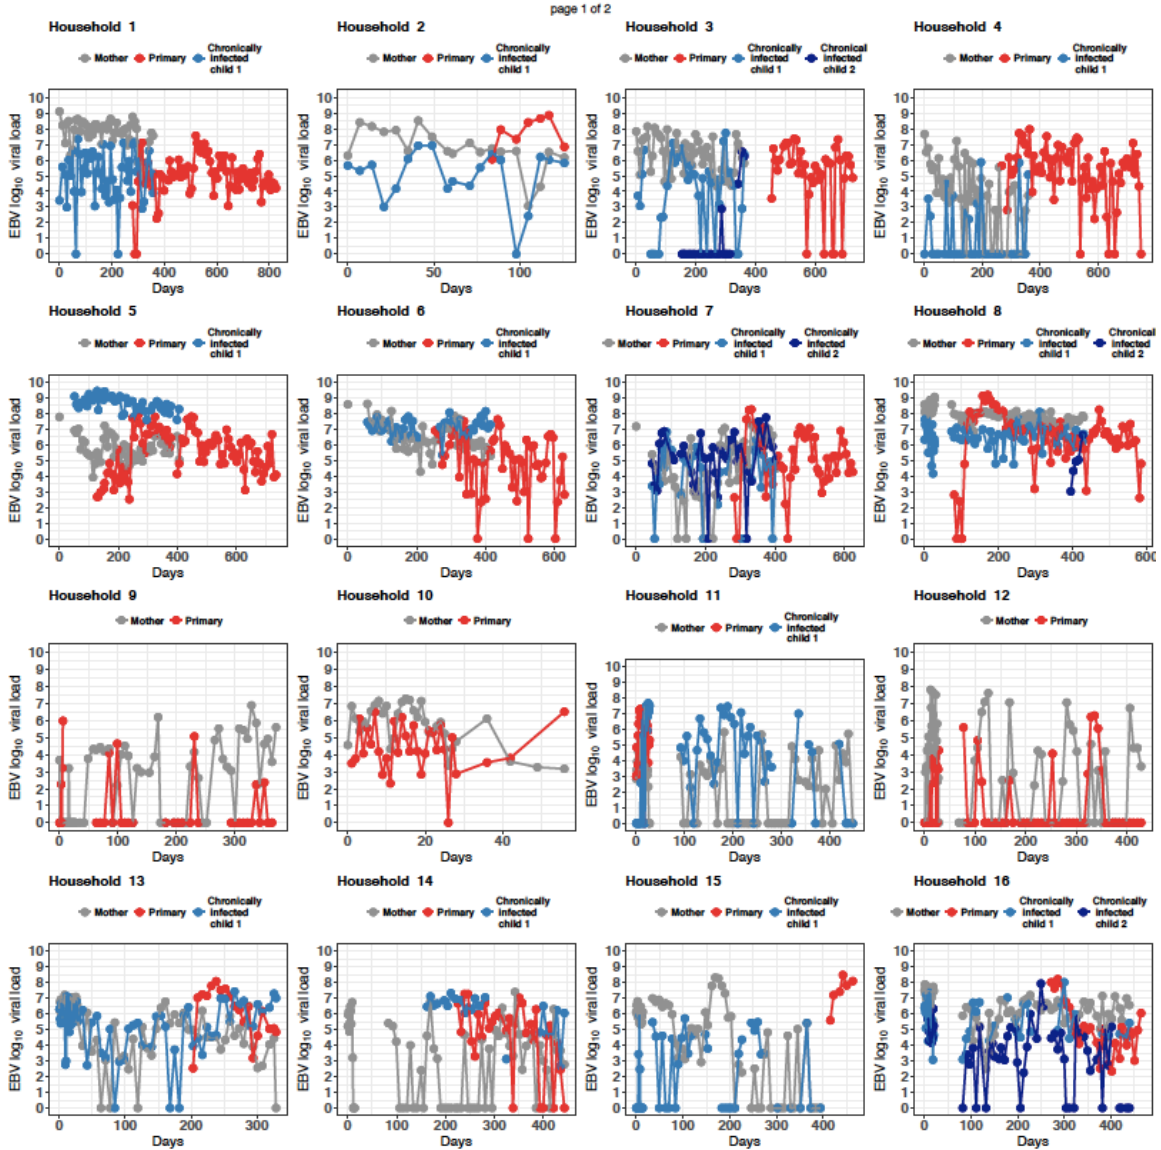

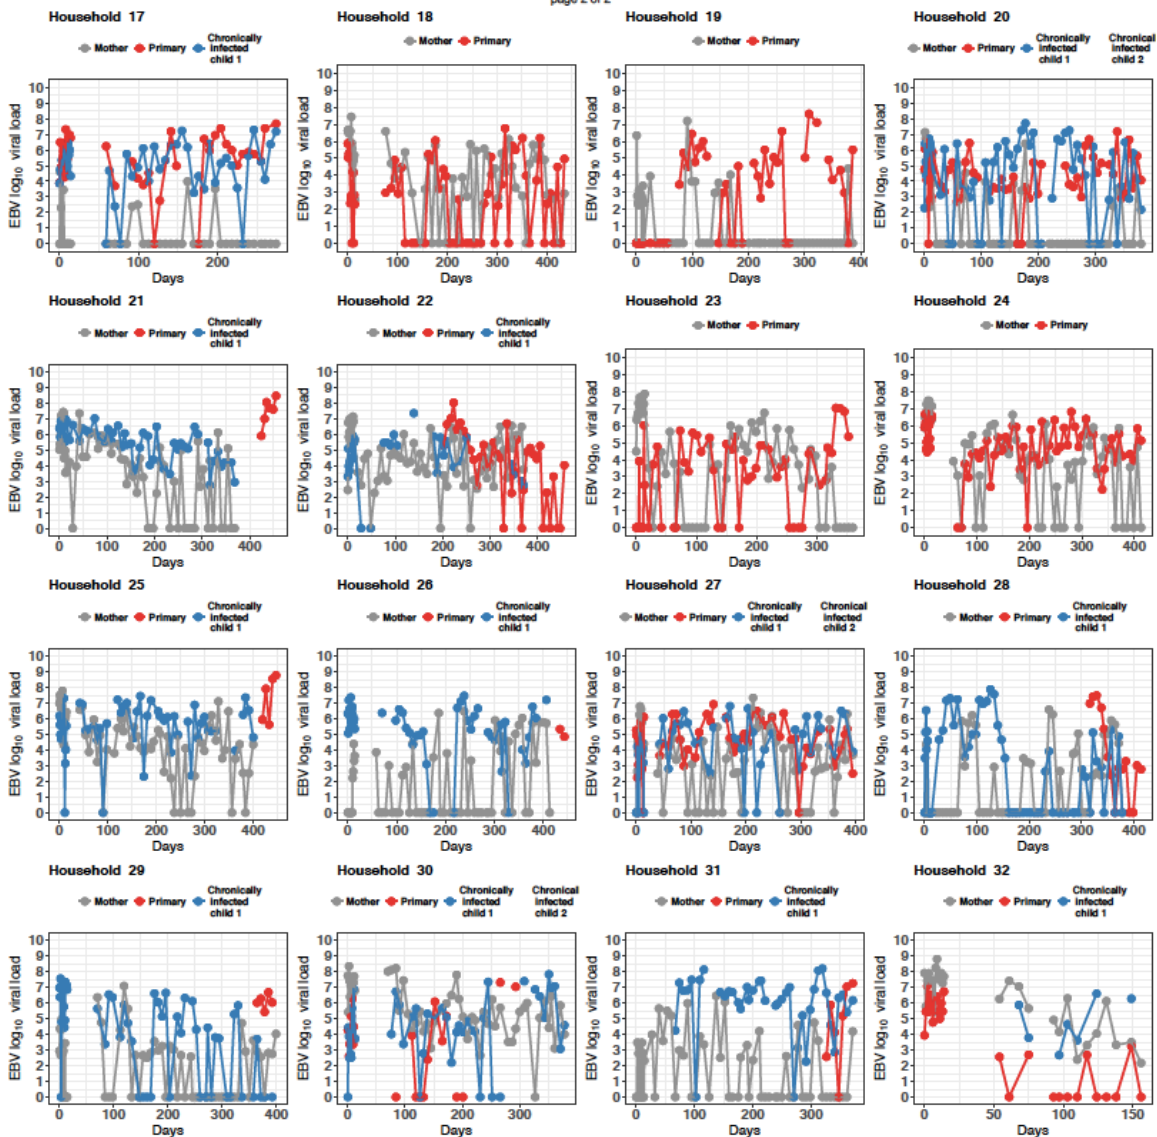

**Figure S3: Oral CMV shedding patterns within families.** Each panel depicts the oral shedding of CMV in a single household. No CMV was detected within families 2 and 8 during the period of the study. Breaks in the lines indicate gaps between two samples of over 15 days.

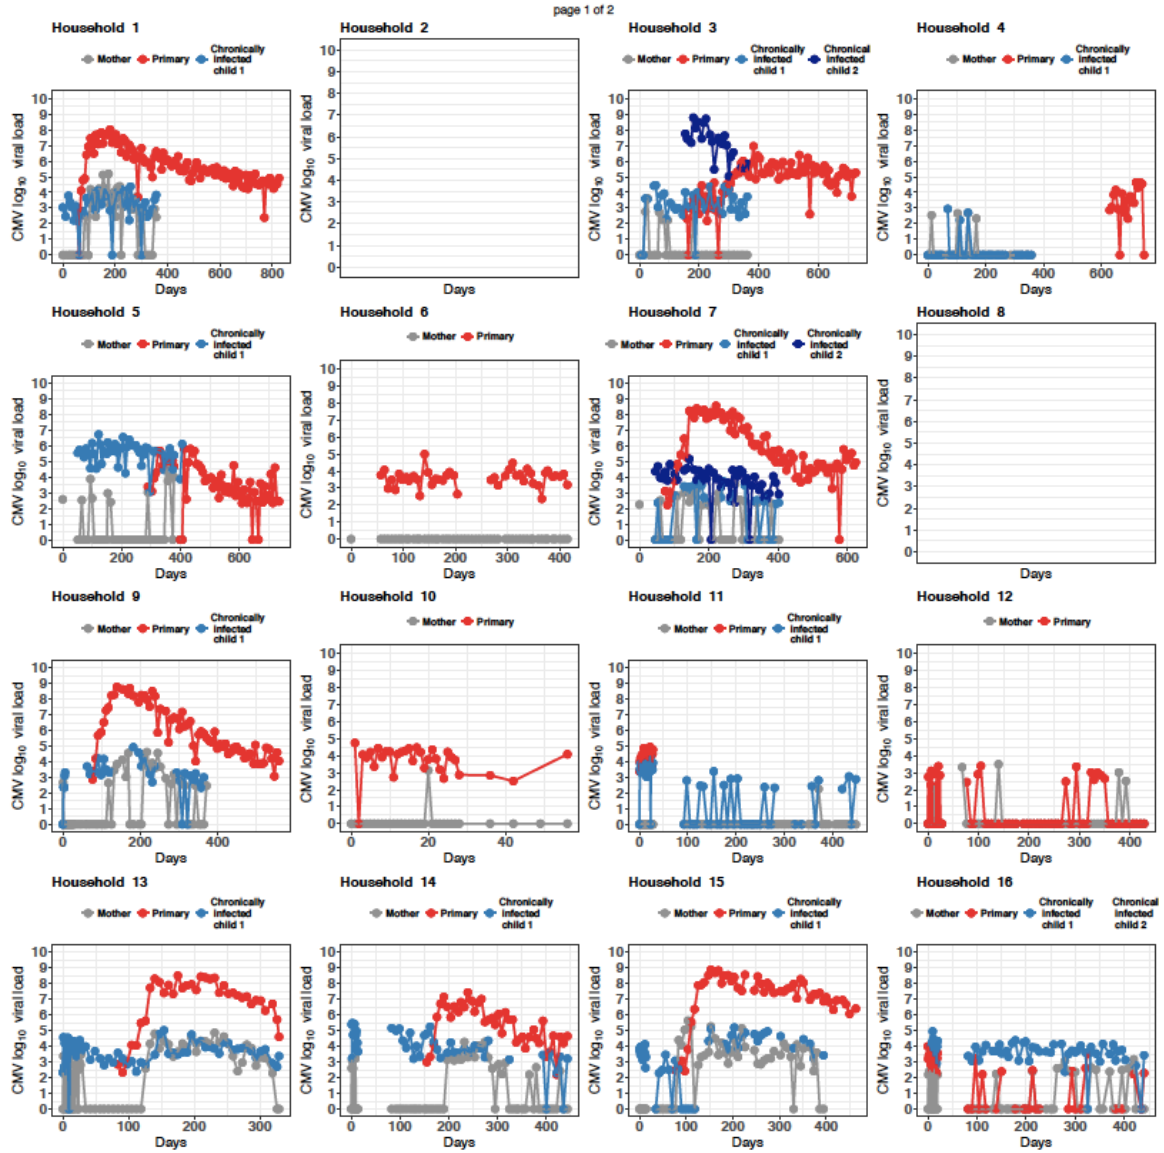

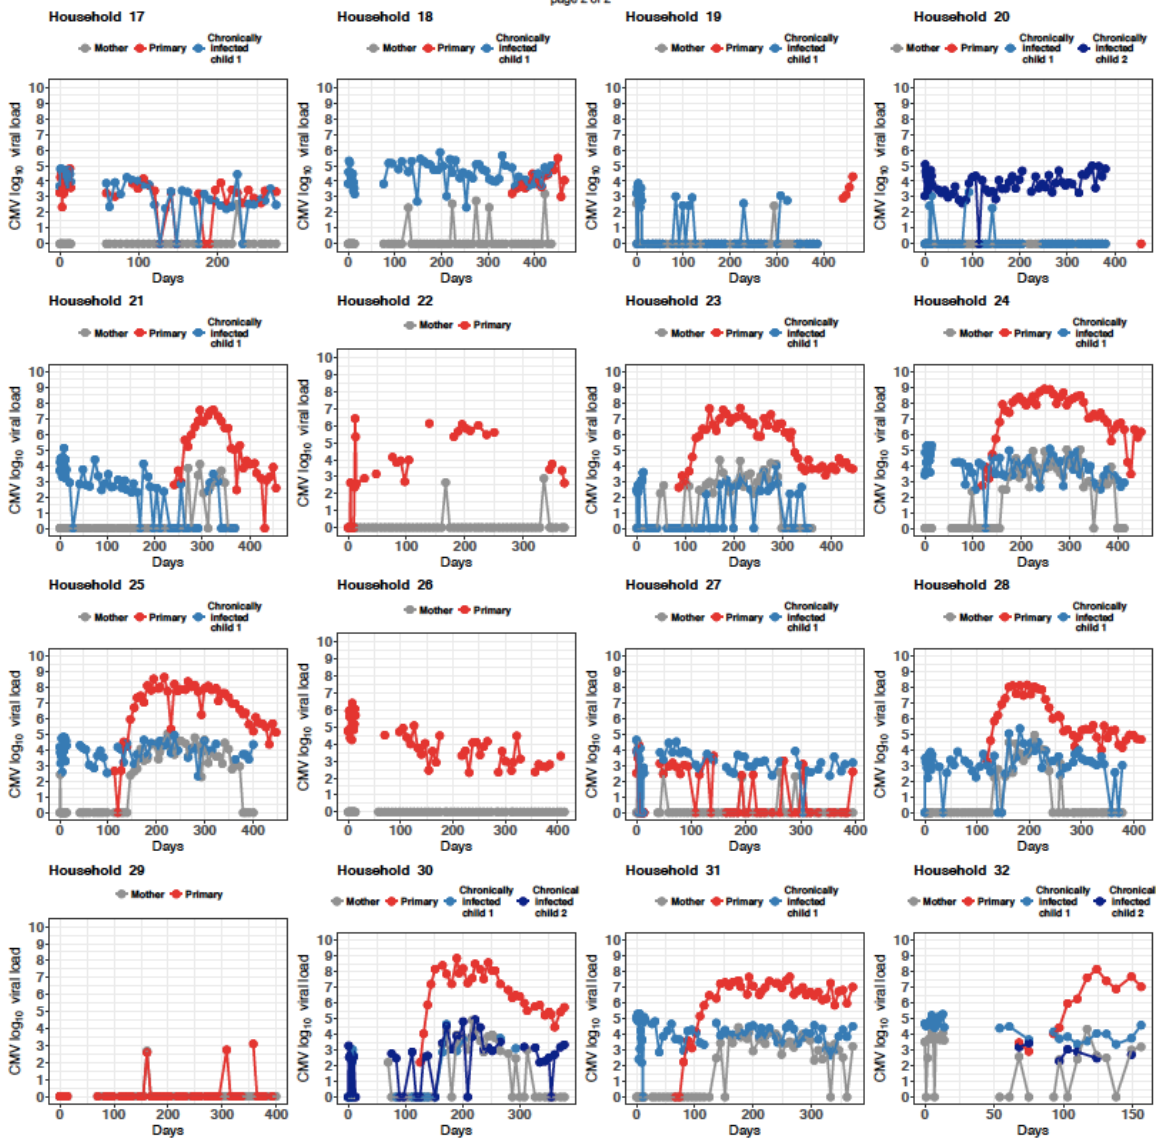

**Figure S4: Oral HHV-6 shedding patterns within families.** Each panel depicts the oral shedding of HHV-6 in a single household. Breaks in the lines indicate gaps between two samples of over 15 days.

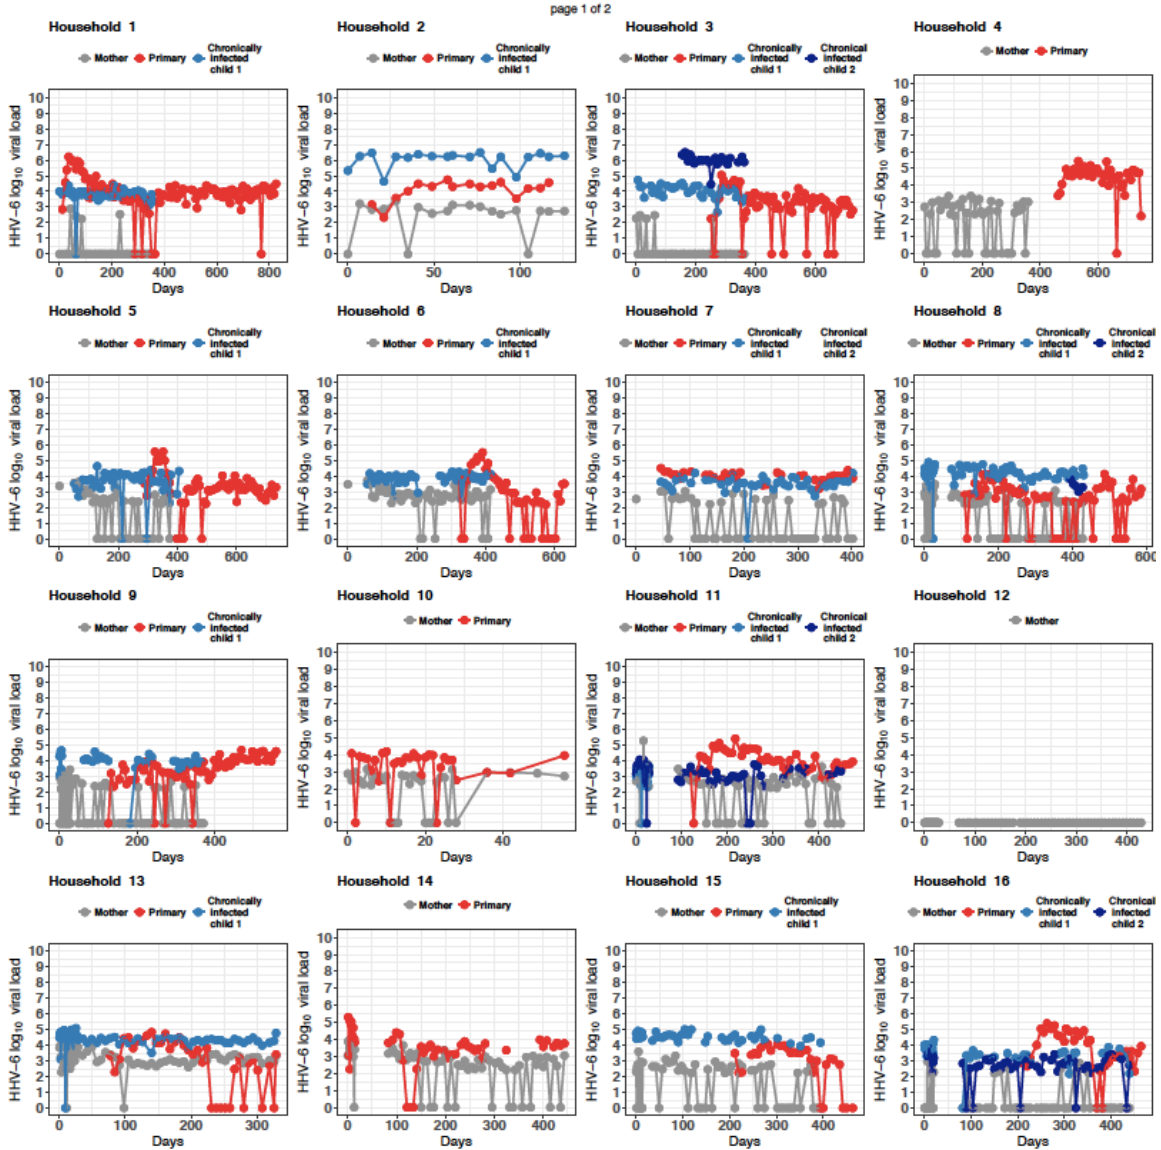



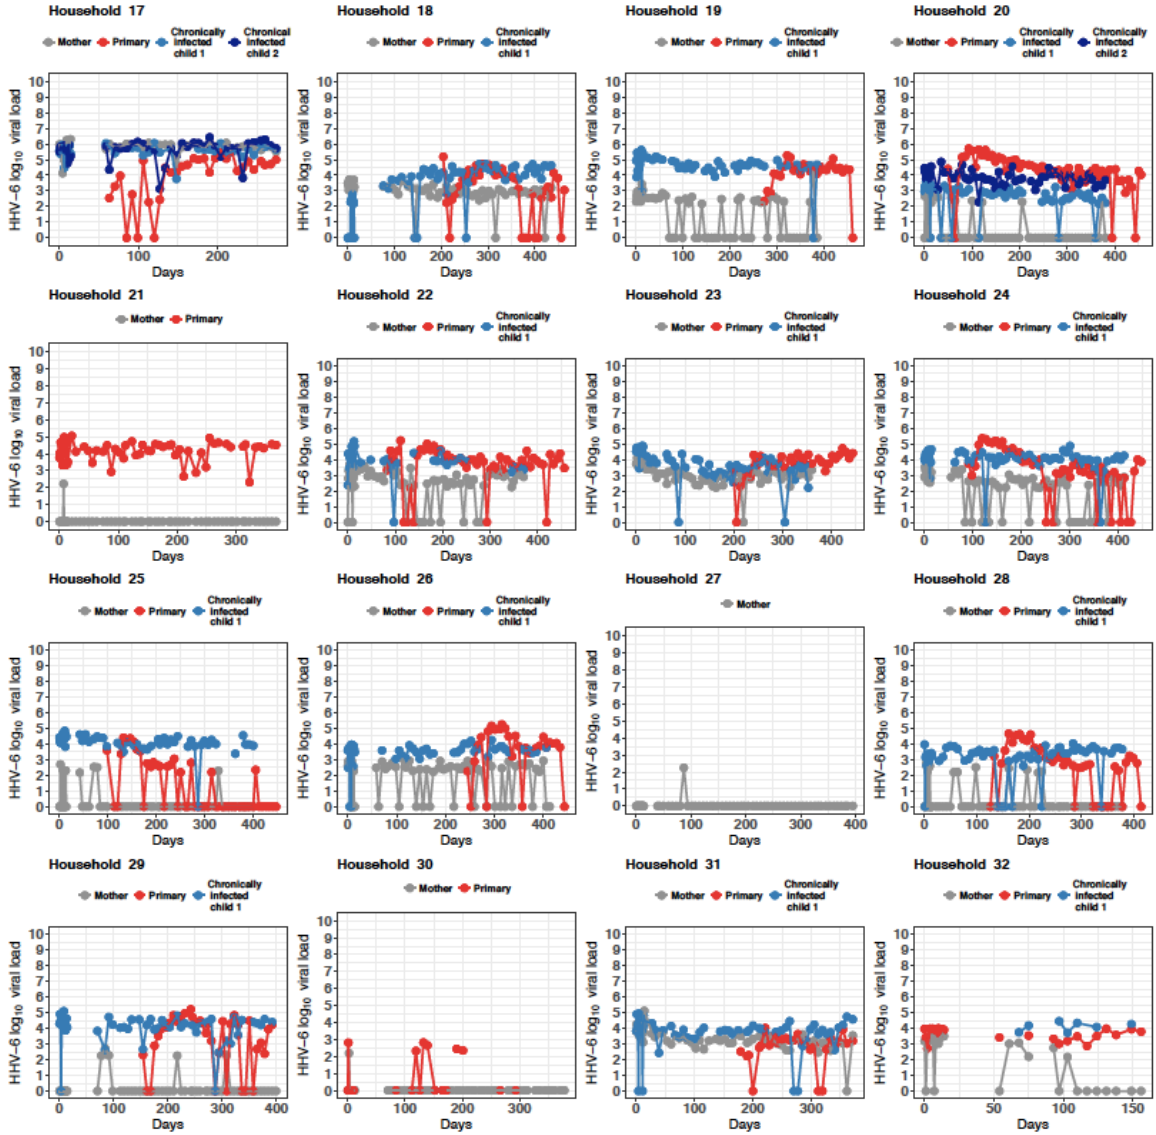

**Figure S5: Shedding patterns of children with primary infections with multiple human herpesviruses.** Beginning at the time of primary infection, shown is the quantity of viral DNA detected in oral swabs collected weekly from the time of birth (Day 0). Each panel shows data from one primary-infected child.

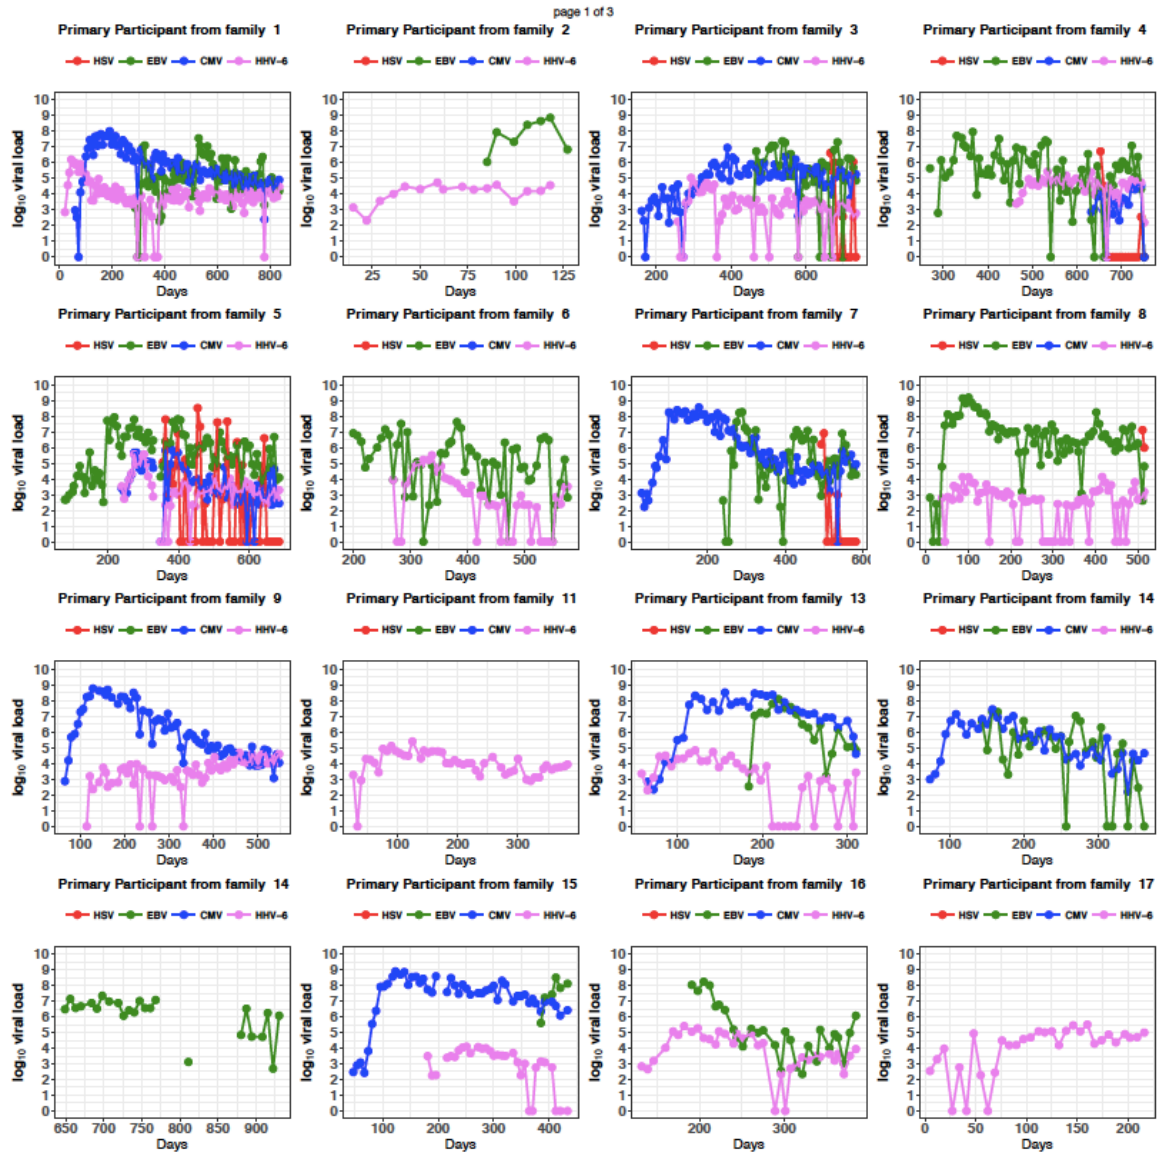

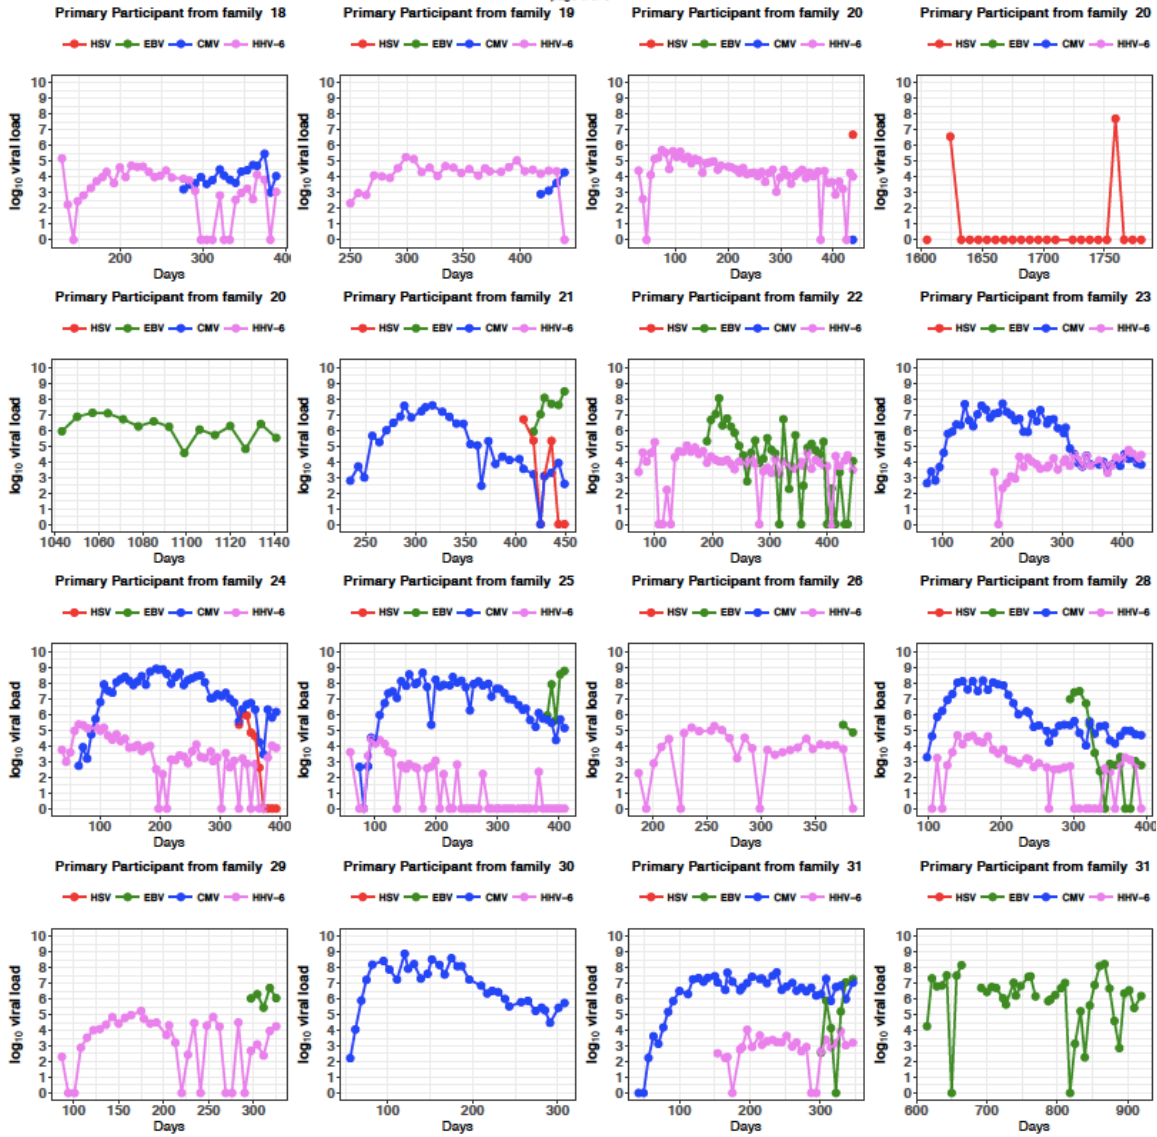

**Figure S6: Shedding probability for each virus compared between cohort groups and within each cohort group compared between different viruses.** Top panels (A) show comparisons between subject groups for each virus, while comparisons between viruses for each subject group are shown in bottom panels (B). Each dot represents the relative risk comparing the group to the left with the group below; dot size denotes the level of the effect and the fill color denotes statistical significance. For example, for the first panel in A, individuals in the primary infection group are 3 to 5 times more likely to shed HSV than chronically infected children, and over 5 times more likely to shed HSV compared to mothers, regardless of their HIV status. All of these differences are statistically significant.

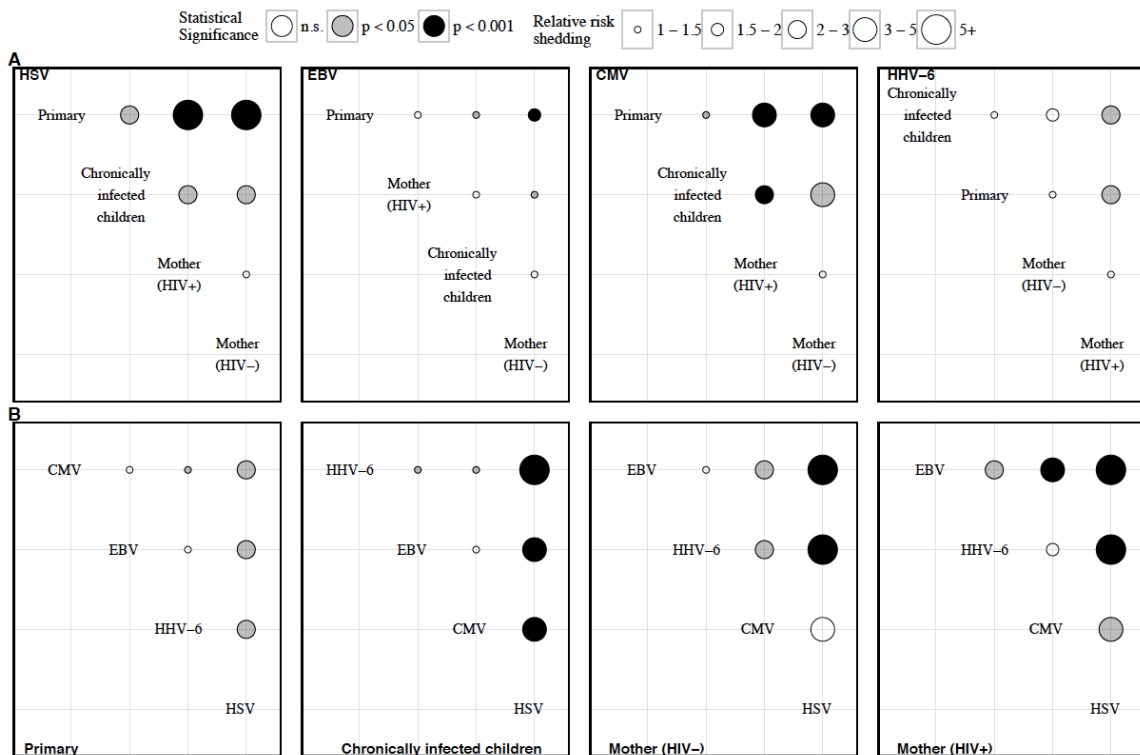

**Figure S7: Difference in mean shedding quantity compared for each virus between cohort groups and within each cohort group between different viruses.** Mean values were calculated for positive samples only. Top panels (A) show comparisons between subject groups for each virus, while comparisons between viruses for each subject group are shown in bottom panels (B). Each dot represents the mean shedding difference between the group to the left with the group below; dot size denotes the magnitude of this difference (in  $\log_{10}$  copies/swab) and the fill denotes statistical significance. For example, for the middle top panel in (A), the mean shedding difference of CMV between individuals in the primary infection group and chronically infected children is between 1 and 2  $\log_{10}$  copies/swab, this difference increases to 2 to 3  $\log_{10}$  copies/swab when comparing the primary infection group to the mothers, regardless of their HIV status ( $p$ -value < 0.001).

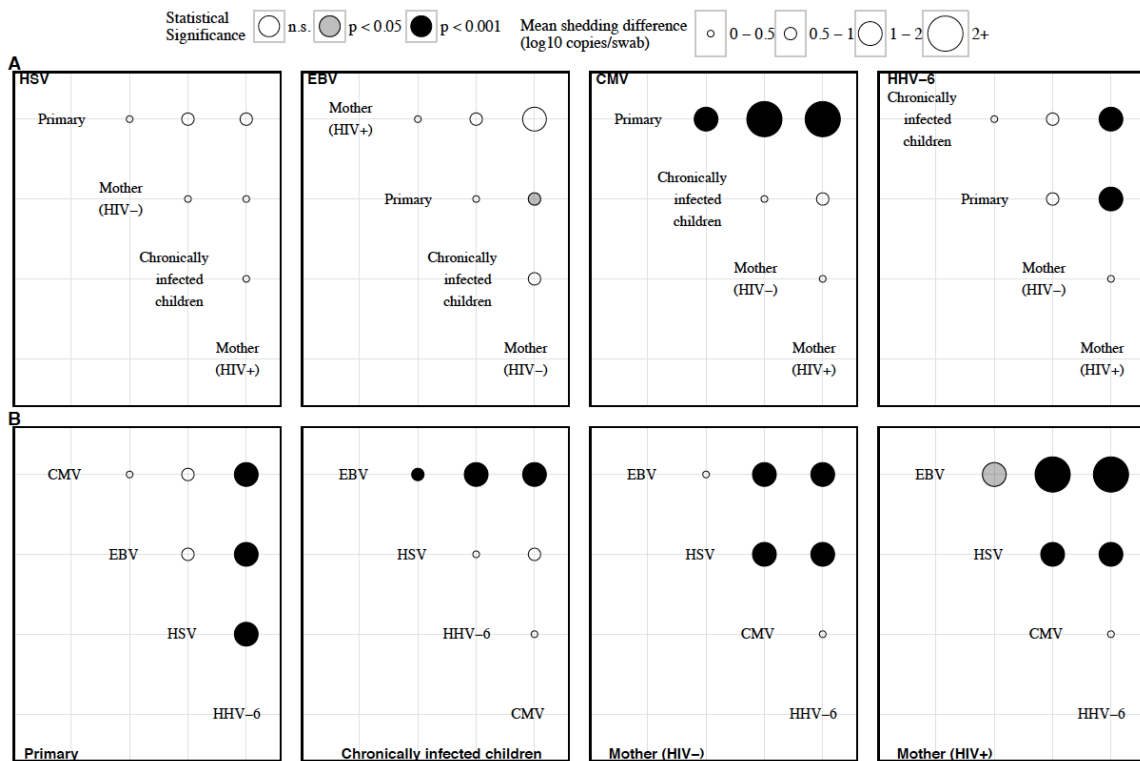

**Table S1: Relative risk of shedding probabilities between viruses and cohorts.**

| Analysis     | Ref. virus | Comp. virus | Ref. group | Comp. group | Relative risk | Raw p value | Adj. p value |
|--------------|------------|-------------|------------|-------------|---------------|-------------|--------------|
| within virus | HHV6       | HHV6        | M          | H           | 0.735         | 0.241       | 1.000        |
| within virus | HHV6       | HHV6        | P          | H           | 0.496         | 0.001       | 0.014        |
| within virus | HHV6       | HHV6        | C          | H           | 0.546         | 0.004       | 0.083        |
| within virus | HHV6       | HHV6        | P          | M           | 0.674         | 0.029       | 0.410        |
| within virus | HHV6       | HHV6        | C          | M           | 0.742         | 0.122       | 1.000        |
| within virus | HHV6       | HHV6        | C          | P           | 1.101         | 0.245       | 1.000        |
| within virus | EBV        | EBV         | M          | H           | 1.428         | 0.002       | 0.046        |
| within virus | EBV        | EBV         | P          | H           | 0.911         | 0.174       | 1.000        |
| within virus | EBV        | EBV         | C          | H           | 1.079         | 0.359       | 1.000        |
| within virus | EBV        | EBV         | P          | M           | 0.638         | 0.000       | 0.000        |
| within virus | EBV        | EBV         | C          | M           | 0.755         | 0.008       | 0.141        |
| within virus | EBV        | EBV         | C          | P           | 1.184         | 0.001       | 0.023        |
| within virus | CMV        | CMV         | M          | H           | 1.180         | 0.637       | 1.000        |
| within virus | CMV        | CMV         | P          | H           | 0.265         | 0.000       | 0.000        |
| within virus | CMV        | CMV         | C          | H           | 0.340         | 0.000       | 0.000        |
| within virus | CMV        | CMV         | P          | M           | 0.224         | 0.000       | 0.000        |
| within virus | CMV        | CMV         | C          | M           | 0.288         | 0.000       | 0.001        |
| within virus | CMV        | CMV         | C          | P           | 1.283         | 0.000       | 0.005        |
| within virus | HSV        | HSV         | M          | H           | 1.215         | 0.573       | 1.000        |
| within virus | HSV        | HSV         | P          | H           | 0.163         | 0.000       | 0.000        |
| within virus | HSV        | HSV         | C          | H           | 0.553         | 0.024       | 0.353        |
| within virus | HSV        | HSV         | P          | M           | 0.134         | 0.000       | 0.000        |
| within virus | HSV        | HSV         | C          | M           | 0.455         | 0.010       | 0.171        |
| within virus | HSV        | HSV         | C          | P           | 3.384         | 0.000       | 0.000        |
| within group | EBV        | CMV         | P          | P           | 1.037         | 0.037       | 0.486        |
| within group | HHV6       | CMV         | P          | P           | 1.135         | 0.001       | 0.014        |
| within group | HSV        | CMV         | P          | P           | 2.212         | 0.000       | 0.000        |
| within group | HHV6       | EBV         | P          | P           | 1.095         | 0.013       | 0.210        |
| within group | HSV        | EBV         | P          | P           | 2.133         | 0.000       | 0.000        |
| within group | HSV        | HHV6        | P          | P           | 1.948         | 0.000       | 0.000        |
| within group | EBV        | CMV         | C          | C           | 0.957         | 0.527       | 1.000        |
| within group | HHV6       | CMV         | C          | C           | 0.974         | 0.765       | 1.000        |
| within group | HSV        | CMV         | C          | C           | 5.831         | 0.000       | 0.000        |
| within group | HHV6       | EBV         | C          | C           | 1.018         | 0.807       | 1.000        |
| within group | HSV        | EBV         | C          | C           | 6.095         | 0.000       | 0.000        |
| within group | HSV        | HHV6        | C          | C           | 5.985         | 0.000       | 0.000        |
| within group | EBV        | CMV         | M          | M           | 0.364         | 0.000       | 0.005        |
| within group | HHV6       | CMV         | M          | M           | 0.378         | 0.001       | 0.014        |
| within group | HSV        | CMV         | M          | M           | 3.687         | 0.003       | 0.069        |
| within group | HHV6       | EBV         | M          | M           | 1.036         | 0.853       | 1.000        |
| within group | HSV        | EBV         | M          | M           | 10.120        | 0.000       | 0.000        |
| within group | HSV        | HHV6        | M          | M           | 9.767         | 0.000       | 0.000        |
| within group | EBV        | CMV         | H          | H           | 0.301         | 0.000       | 0.000        |
| within group | HHV6       | CMV         | H          | H           | 0.606         | 0.139       | 1.000        |
| within group | HSV        | CMV         | H          | H           | 3.582         | 0.000       | 0.007        |
| within group | HHV6       | EBV         | H          | H           | 2.013         | 0.001       | 0.017        |
| within group | HSV        | EBV         | H          | H           | 11.896        | 0.000       | 0.000        |
| within group | HSV        | HHV6        | H          | H           | 5.910         | 0.000       | 0.000        |

Abbreviations: Ref. = reference, Comp. = comparator, P= primary children, C= chronically-infected children, M=HIV-negative mothers, H=HIV-positive mothers.

**Table S2: Differences in shedding magnitude between viruses and cohorts.**

| Ref. virus | Comp. virus | Ref. group | Comp. group | Mean diff. (log <sub>10</sub> virus copies) | Adj. p value | 95% confidence interval |
|------------|-------------|------------|-------------|---------------------------------------------|--------------|-------------------------|
| CMV        | CMV         | M          | H           | -0.177                                      | 1.000        | -0.854, 0.500           |
| CMV        | CMV         | P          | H           | -2.506                                      | 0.000        | -3.529, -1.484          |
| CMV        | CMV         | C          | H           | -0.569                                      | 0.200        | -1.260, 0.122           |
| EBV        | CMV         | H          | H           | -2.638                                      | 0.000        | -3.995, -1.280          |
| EBV        | CMV         | M          | H           | -1.510                                      | 0.000        | -2.303, -0.717          |
| EBV        | CMV         | P          | H           | -2.439                                      | 0.000        | -3.269, -1.609          |
| EBV        | CMV         | C          | H           | -2.086                                      | 0.000        | -2.884, -1.289          |
| HHV6       | CMV         | H          | H           | 0.451                                       | 0.297        | -0.125, 1.028           |
| HHV6       | CMV         | M          | H           | 0.055                                       | 1.000        | -0.995, 1.104           |
| HHV6       | CMV         | P          | H           | -0.560                                      | 0.144        | -1.217, 0.096           |
| HHV6       | CMV         | C          | H           | -0.724                                      | 0.013        | -1.411, -0.036          |
| HHV8       | CMV         | H          | H           | -1.195                                      | 0.000        | -1.885, -0.505          |
| HHV8       | CMV         | M          | H           | -0.713                                      | 1.000        | -2.573, 1.148           |
| HHV8       | CMV         | C          | H           | -1.450                                      | 0.000        | -2.433, -0.467          |
| HSV        | CMV         | H          | H           | -1.054                                      | 0.001        | -1.898, -0.210          |
| HSV        | CMV         | M          | H           | -1.358                                      | 0.000        | -2.311, -0.405          |
| HSV        | CMV         | P          | H           | -1.774                                      | 0.000        | -2.732, -0.816          |
| HSV        | CMV         | C          | H           | -1.073                                      | 0.000        | -1.822, -0.324          |
| CMV        | CMV         | P          | M           | -2.329                                      | 0.000        | -3.263, -1.396          |
| CMV        | CMV         | C          | M           | -0.392                                      | 0.551        | -0.944, 0.160           |
| EBV        | CMV         | H          | M           | -2.460                                      | 0.000        | -3.750, -1.171          |
| EBV        | CMV         | M          | M           | -1.333                                      | 0.000        | -1.821, -0.845          |
| EBV        | CMV         | P          | M           | -2.262                                      | 0.000        | -2.980, -1.543          |
| EBV        | CMV         | C          | M           | -1.909                                      | 0.000        | -2.590, -1.229          |
| HHV6       | CMV         | H          | M           | 0.628                                       | 0.000        | 0.208, 1.049            |
| HHV6       | CMV         | M          | M           | 0.232                                       | 1.000        | -0.777, 1.241           |
| HHV6       | CMV         | P          | M           | -0.383                                      | 0.389        | -0.891, 0.124           |
| HHV6       | CMV         | C          | M           | -0.547                                      | 0.026        | -1.094, 0.001           |
| HHV8       | CMV         | H          | M           | -1.018                                      | 0.000        | -1.651, -0.385          |
| HHV8       | CMV         | M          | M           | -0.536                                      | 1.000        | -2.110, 1.039           |
| HHV8       | CMV         | C          | M           | -1.273                                      | 0.000        | -2.164, -0.382          |
| HSV        | CMV         | H          | M           | -0.877                                      | 0.001        | -1.592, -0.162          |
| HSV        | CMV         | M          | M           | -1.181                                      | 0.000        | -2.105, -0.256          |
| HSV        | CMV         | P          | M           | -1.597                                      | 0.000        | -2.460, -0.734          |
| HSV        | CMV         | C          | M           | -0.896                                      | 0.000        | -1.519, -0.273          |
| CMV        | CMV         | C          | P           | 1.938                                       | 0.000        | 0.993, 2.882            |
| EBV        | CMV         | H          | P           | -0.131                                      | 1.000        | -1.631, 1.369           |
| EBV        | CMV         | M          | P           | 0.996                                       | 0.035        | -0.025, 2.018           |
| EBV        | CMV         | P          | P           | 0.068                                       | 1.000        | -0.909, 1.045           |
| EBV        | CMV         | C          | P           | 0.420                                       | 1.000        | -0.605, 1.445           |
| HHV6       | CMV         | H          | P           | 2.958                                       | 0.000        | 2.084, 3.832            |
| HHV6       | CMV         | M          | P           | 2.561                                       | 0.000        | 1.330, 3.792            |
| HHV6       | CMV         | P          | P           | 1.946                                       | 0.000        | 1.039, 2.853            |
| HHV6       | CMV         | C          | P           | 1.783                                       | 0.000        | 0.841, 2.725            |
| HHV8       | CMV         | H          | P           | 1.311                                       | 0.000        | 0.318, 2.305            |
| HHV8       | CMV         | M          | P           | 1.794                                       | 0.075        | -0.175, 3.762           |
| HHV8       | CMV         | C          | P           | 1.056                                       | 0.086        | -0.119, 2.231           |
| HSV        | CMV         | H          | P           | 1.452                                       | 0.000        | 0.404, 2.500            |

|      |     |   |   |        |       |                |
|------|-----|---|---|--------|-------|----------------|
| HSV  | CMV | M | P | 1.149  | 0.026 | -0.001, 2.299  |
| HSV  | CMV | P | P | 0.732  | 1.000 | -0.631, 2.095  |
| HSV  | CMV | C | P | 1.433  | 0.000 | 0.446, 2.421   |
| EBV  | CMV | H | C | -2.069 | 0.000 | -3.366, -0.772 |
| EBV  | CMV | M | C | -0.941 | 0.000 | -1.631, -0.252 |
| EBV  | CMV | P | C | -1.870 | 0.000 | -2.594, -1.146 |
| EBV  | CMV | C | C | -1.518 | 0.000 | -2.080, -0.956 |
| HHV6 | CMV | H | C | 1.020  | 0.000 | 0.577, 1.463   |
| HHV6 | CMV | M | C | 0.623  | 1.000 | -0.350, 1.597  |
| HHV6 | CMV | P | C | 0.008  | 1.000 | -0.518, 0.535  |
| HHV6 | CMV | C | C | -0.155 | 1.000 | -0.682, 0.373  |
| HHV8 | CMV | H | C | -0.626 | 0.038 | -1.274, 0.022  |
| HHV8 | CMV | M | C | -0.144 | 1.000 | -1.963, 1.675  |
| HHV8 | CMV | C | C | -0.881 | 0.035 | -1.786, 0.023  |
| HSV  | CMV | H | C | -0.486 | 0.830 | -1.214, 0.243  |
| HSV  | CMV | M | C | -0.789 | 0.077 | -1.658, 0.080  |
| HSV  | CMV | P | C | -1.205 | 0.000 | -2.080, -0.331 |
| HSV  | CMV | C | C | -0.504 | 0.402 | -1.176, 0.168  |
| EBV  | EBV | M | H | 1.127  | 0.180 | -0.227, 2.482  |
| EBV  | EBV | P | H | 0.199  | 1.000 | -1.178, 1.575  |
| EBV  | EBV | C | H | 0.551  | 1.000 | -0.806, 1.908  |
| HHV6 | EBV | H | H | 3.089  | 0.000 | 1.783, 4.395   |
| HHV6 | EBV | M | H | 2.692  | 0.000 | 1.174, 4.211   |
| HHV6 | EBV | P | H | 2.077  | 0.000 | 0.798, 3.356   |
| HHV6 | EBV | C | H | 1.914  | 0.000 | 0.619, 3.209   |
| HHV8 | EBV | H | H | 1.443  | 0.000 | 0.454, 2.431   |
| HHV8 | EBV | M | H | 1.925  | 0.093 | -0.235, 4.085  |
| HHV8 | EBV | C | H | 1.187  | 0.236 | -0.286, 2.661  |
| HSV  | EBV | H | H | 1.583  | 0.012 | 0.087, 3.079   |
| HSV  | EBV | M | H | 1.280  | 0.105 | -0.174, 2.733  |
| HSV  | EBV | P | H | 0.863  | 1.000 | -0.594, 2.320  |
| HSV  | EBV | C | H | 1.565  | 0.002 | 0.236, 2.893   |
| EBV  | EBV | P | M | -0.929 | 0.005 | -1.758, -0.100 |
| EBV  | EBV | C | M | -0.576 | 0.483 | -1.372, 0.219  |
| HHV6 | EBV | H | M | 1.961  | 0.000 | 1.372, 2.551   |
| HHV6 | EBV | M | M | 1.565  | 0.000 | 0.463, 2.666   |
| HHV6 | EBV | P | M | 0.950  | 0.000 | 0.295, 1.604   |
| HHV6 | EBV | C | M | 0.786  | 0.003 | 0.101, 1.472   |
| HHV8 | EBV | H | M | 0.315  | 1.000 | -0.441, 1.071  |
| HHV8 | EBV | M | M | 0.797  | 1.000 | -0.894, 2.489  |
| HHV8 | EBV | C | M | 0.060  | 1.000 | -0.922, 1.042  |
| HSV  | EBV | H | M | 0.456  | 1.000 | -0.370, 1.282  |
| HSV  | EBV | M | M | 0.152  | 1.000 | -0.766, 1.070  |
| HSV  | EBV | P | M | -0.264 | 1.000 | -1.221, 0.693  |
| HSV  | EBV | C | M | 0.437  | 1.000 | -0.310, 1.185  |
| EBV  | EBV | C | P | 0.352  | 1.000 | -0.481, 1.185  |
| HHV6 | EBV | H | P | 2.890  | 0.000 | 2.251, 3.529   |
| HHV6 | EBV | M | P | 2.493  | 0.000 | 1.417, 3.570   |
| HHV6 | EBV | P | P | 1.879  | 0.000 | 1.046, 2.711   |
| HHV6 | EBV | C | P | 1.715  | 0.000 | 0.978, 2.452   |
| HHV8 | EBV | H | P | 1.244  | 0.000 | 0.449, 2.038   |
| HHV8 | EBV | M | P | 1.726  | 0.068 | -0.150, 3.602  |
| HHV8 | EBV | C | P | 0.989  | 0.035 | -0.024, 2.001  |
| HSV  | EBV | H | P | 1.385  | 0.000 | 0.523, 2.246   |



|      |      |   |   |        |       |                |
|------|------|---|---|--------|-------|----------------|
| HSV  | EBV  | M | P | 1.081  | 0.007 | 0.098, 2.064   |
| HSV  | EBV  | P | P | 0.665  | 0.453 | -0.238, 1.567  |
| HSV  | EBV  | C | P | 1.366  | 0.000 | 0.572, 2.159   |
| HHV6 | EBV  | H | C | 2.538  | 0.000 | 1.943, 3.133   |
| HHV6 | EBV  | M | C | 2.141  | 0.000 | 1.090, 3.193   |
| HHV6 | EBV  | P | C | 1.526  | 0.000 | 0.866, 2.186   |
| HHV6 | EBV  | C | C | 1.363  | 0.000 | 0.709, 2.017   |
| HHV8 | EBV  | H | C | 0.891  | 0.002 | 0.131, 1.652   |
| HHV8 | EBV  | M | C | 1.374  | 0.453 | -0.488, 3.236  |
| HHV8 | EBV  | C | C | 0.636  | 1.000 | -0.375, 1.648  |
| HSV  | EBV  | H | C | 1.032  | 0.001 | 0.202, 1.862   |
| HSV  | EBV  | M | C | 0.729  | 0.368 | -0.227, 1.684  |
| HSV  | EBV  | P | C | 0.312  | 1.000 | -0.648, 1.273  |
| HSV  | EBV  | C | C | 1.013  | 0.000 | 0.348, 1.679   |
| HHV6 | HHV6 | M | H | -0.397 | 1.000 | -1.302, 0.508  |
| HHV6 | HHV6 | P | H | -1.012 | 0.000 | -1.398, -0.625 |
| HHV6 | HHV6 | C | H | -1.175 | 0.000 | -1.613, -0.737 |
| HHV8 | HHV6 | H | H | -1.646 | 0.000 | -2.202, -1.091 |
| HHV8 | HHV6 | M | H | -1.164 | 0.932 | -2.947, 0.619  |
| HHV8 | HHV6 | C | H | -1.902 | 0.000 | -2.729, -1.074 |
| HSV  | HHV6 | H | H | -1.506 | 0.000 | -2.129, -0.882 |
| HSV  | HHV6 | M | H | -1.809 | 0.000 | -2.601, -1.017 |
| HSV  | HHV6 | P | H | -2.226 | 0.000 | -3.023, -1.428 |
| HSV  | HHV6 | C | H | -1.524 | 0.000 | -2.053, -0.995 |
| HHV6 | HHV6 | P | M | -0.615 | 0.960 | -1.564, 0.334  |
| HHV6 | HHV6 | C | M | -0.778 | 0.245 | -1.749, 0.193  |
| HHV8 | HHV6 | H | M | -1.250 | 0.001 | -2.271, -0.228 |
| HHV8 | HHV6 | M | M | -0.767 | 1.000 | -2.817, 1.283  |
| HHV8 | HHV6 | C | M | -1.505 | 0.001 | -2.703, -0.306 |
| HSV  | HHV6 | H | M | -1.109 | 0.017 | -2.183, -0.034 |
| HSV  | HHV6 | M | M | -1.412 | 0.000 | -2.221, -0.604 |
| HSV  | HHV6 | P | M | -1.829 | 0.000 | -3.007, -0.651 |
| HSV  | HHV6 | C | M | -1.128 | 0.006 | -2.143, -0.112 |
| HHV6 | HHV6 | C | P | -0.163 | 1.000 | -0.686, 0.359  |
| HHV8 | HHV6 | H | P | -0.635 | 0.015 | -1.246, -0.024 |
| HHV8 | HHV6 | M | P | -0.152 | 1.000 | -1.958, 1.653  |
| HHV8 | HHV6 | C | P | -0.890 | 0.021 | -1.765, -0.014 |
| HSV  | HHV6 | H | P | -0.494 | 0.551 | -1.190, 0.202  |
| HSV  | HHV6 | M | P | -0.798 | 0.048 | -1.639, 0.044  |
| HSV  | HHV6 | P | P | -1.214 | 0.000 | -2.149, -0.279 |
| HSV  | HHV6 | C | P | -0.513 | 0.144 | -1.114, 0.088  |
| HHV8 | HHV6 | H | C | -0.471 | 0.466 | -1.116, 0.173  |
| HHV8 | HHV6 | M | C | 0.011  | 1.000 | -1.806, 1.828  |
| HHV8 | HHV6 | C | C | -0.727 | 0.217 | -1.619, 0.166  |
| HSV  | HHV6 | H | C | -0.331 | 1.000 | -1.056, 0.395  |
| HSV  | HHV6 | M | C | -0.634 | 0.466 | -1.500, 0.232  |
| HSV  | HHV6 | P | C | -1.050 | 0.001 | -1.922, -0.179 |
| HSV  | HHV6 | C | C | -0.349 | 1.000 | -0.974, 0.275  |
| HHV8 | HHV8 | M | H | 0.482  | 1.000 | -1.363, 2.327  |
| HHV8 | HHV8 | C | H | -0.255 | 1.000 | -1.209, 0.698  |
| HSV  | HHV8 | H | H | 0.141  | 1.000 | -0.848, 1.129  |
| HSV  | HHV8 | M | H | -0.163 | 1.000 | -1.085, 0.759  |
| HSV  | HHV8 | P | H | -0.579 | 1.000 | -1.507, 0.348  |
| HSV  | HHV8 | C | H | 0.122  | 1.000 | -0.588, 0.831  |

|      |      |   |   |        |       |               |
|------|------|---|---|--------|-------|---------------|
| HHV8 | HHV8 | C | M | -0.738 | 1.000 | -2.686, 1.211 |
| HSV  | HHV8 | H | M | -0.342 | 1.000 | -2.216, 1.533 |
| HSV  | HHV8 | M | M | -0.645 | 1.000 | -2.746, 1.456 |
| HSV  | HHV8 | P | M | -1.061 | 1.000 | -2.998, 0.875 |
| HSV  | HHV8 | C | M | -0.360 | 1.000 | -2.202, 1.481 |
| HSV  | HHV8 | H | C | 0.396  | 1.000 | -0.614, 1.406 |
| HSV  | HHV8 | M | C | 0.092  | 1.000 | -1.023, 1.208 |
| HSV  | HHV8 | P | C | -0.324 | 1.000 | -1.444, 0.796 |
| HSV  | HHV8 | C | C | 0.377  | 1.000 | -0.567, 1.321 |
| HSV  | HSV  | M | H | -0.304 | 1.000 | -1.284, 0.677 |
| HSV  | HSV  | P | H | -0.720 | 0.466 | -1.705, 0.265 |
| HSV  | HSV  | C | H | -0.019 | 1.000 | -0.803, 0.765 |
| HSV  | HSV  | P | M | -0.416 | 1.000 | -1.510, 0.677 |
| HSV  | HSV  | C | M | 0.285  | 1.000 | -0.631, 1.200 |
| HSV  | HSV  | C | P | 0.701  | 0.368 | -0.220, 1.622 |

Mean difference between shedding means comparing within-viruses or within cohorts.

Comparisons were not made between cohorts across viruses (e.g., comparing mean difference of shedding of CMV in primary participants and EBV in HIV-positive mothers).

In the table, the following abbreviations were used: Ref. = reference, Comp. = comparator, P= children with primary infection, C= children with chronic infection, M=HIV-negative mothers, H=HIV-positive mothers.
